# Supplementary material
Source: publisher figshare collection journal article supplement (https://karger.figshare.com/ndownloader/files/23898944)
Supplement: Supplementary file 1 [file 23898944]

**Table S4.** The number of chemotherapeutic regimens administered after nab-PTX

| **Regimens, N** | **Patients, N (%)** |
| --- | --- |
| 1 | 12 (60) |
| 2 | 4 (20) |
| 3 | 2 (10) |
| ≥ 4 | 2 (10) |
